# Supplementary material
Source: PubMed Central journal article supplement (PMC11027646)
Supplement: 262_2020_2557_MOESM1_ESM.pdf [file 262_2020_2557_MOESM1_ESM.pdf]

# **Prognostic stromal and intratumoral CD3, CD8 and FOXP3 in adjuvantly treated breast cancer: do they add information over stromal tumor-infiltrating lymphocyte density?**

*by Koletsa T, Kotoula V, Koliou GA, et al.*

## **SUPPLEMENTARY INFORMATION**

**Supplementary Figure S1:** Examples of area records for the assessment of the surface occupied by each tumor compartment on 1.5mm cores.

**Supplementary Figure S2:** Descriptive statistics of continuous measurements for CD3, CD8 and FOXP3 markers, as well as stromal TIL density.

**Supplementary Figure S3:** Lymphocytic subsets (counts/mm<sup>2</sup>) assessed as categorical variables (high/low) on patient disease-free survival (DFS) and overall survival (OS).

**Supplementary Table S1:** Clinical trial characteristics.

**Supplementary Table S2:** Antibodies and staining conditions for CD3, CD8 and FOXP3 immunohistochemistry.

**Supplementary Table S3:** Spearman correlations among continuous lymphocytic markers.

**Supplementary Table S4:** Associations of CD3, CD8, FOXP3 and sTIL density with clinicopathological parameters.

**Supplementary Table S5:** Hazard ratios (95% CI) estimated from univariate Cox regression for each of the clinicopathological parameters with respect to the total follow-up period.

**Supplementary Table S6:** Cox multivariate regression analysis for DFS and OS in the entire cohort. sTIL density and lymphocytic subsets examined as single markers.

**Supplementary Figure S1: Examples of area records for the assessment of the surface occupied by each tumor compartment on 1.5mm cores. A – E: Two pictures from the same tumor are shown. Areas on H&E slides matched to IHC were recorded (A & B). Tumor area: stroma + malignant cells. The area of each tumor compartment (stroma or malignant cells) and the lymphocytic density within the same compartment varied in different cores from the same tumor (C – E). Non-tumor elements were excluded, e.g., fat in B, remnants of breast tissue in D (left). Original magnifications are shown.**

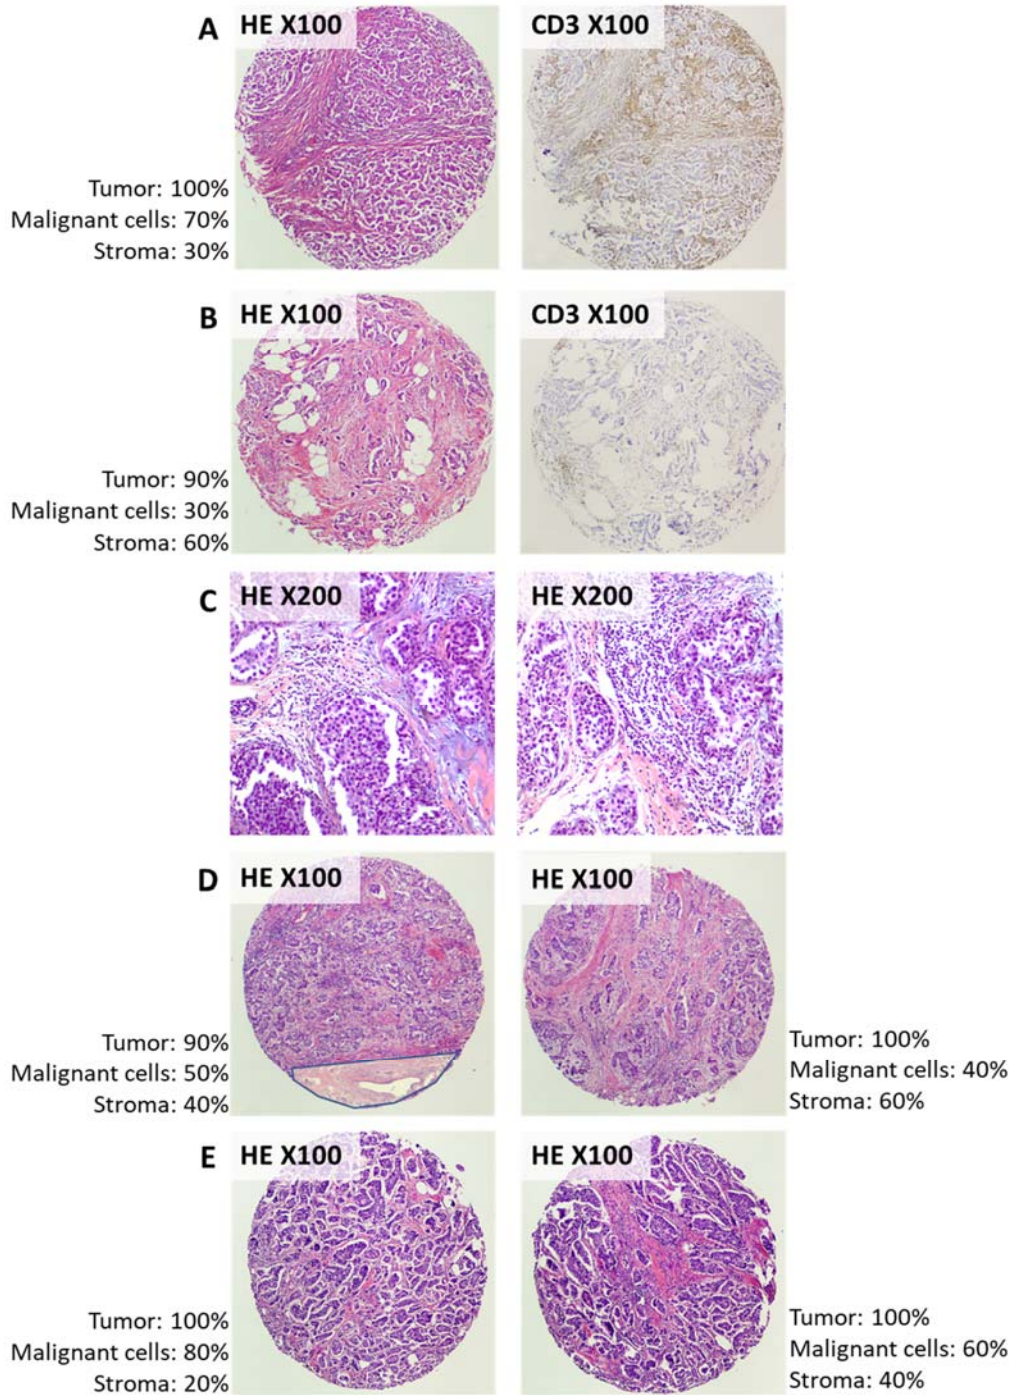

**Supplementary Figure S2: Descriptive statistics of continuous measurements for CD3, CD8 and FOXP3 markers, as well as stromal TIL density.**

Distributions and cut-offs are shown for each marker, whereby:

- sCD3, sCD8, sFOXP3: positive cell counts per mm<sup>2</sup> stromal surface;
- iCD3, iCD8, iFOXP3: positive cell counts per mm<sup>2</sup> malignant cell surface (intratumoral);
- total CD3, total CD8, total FOXP3: sum of stromal and intratumoral positive cell counts per mm<sup>2</sup> of total tumor surface (stroma + malignant cells).

Based on the many outliers (>10% of eligible tumors for each CD3, CD8, FOXP3), the cut-off for high/low per marker was set at the upper quartile (75% percentile, red lines).

Stromal TIL density was used as a continuous variable only.

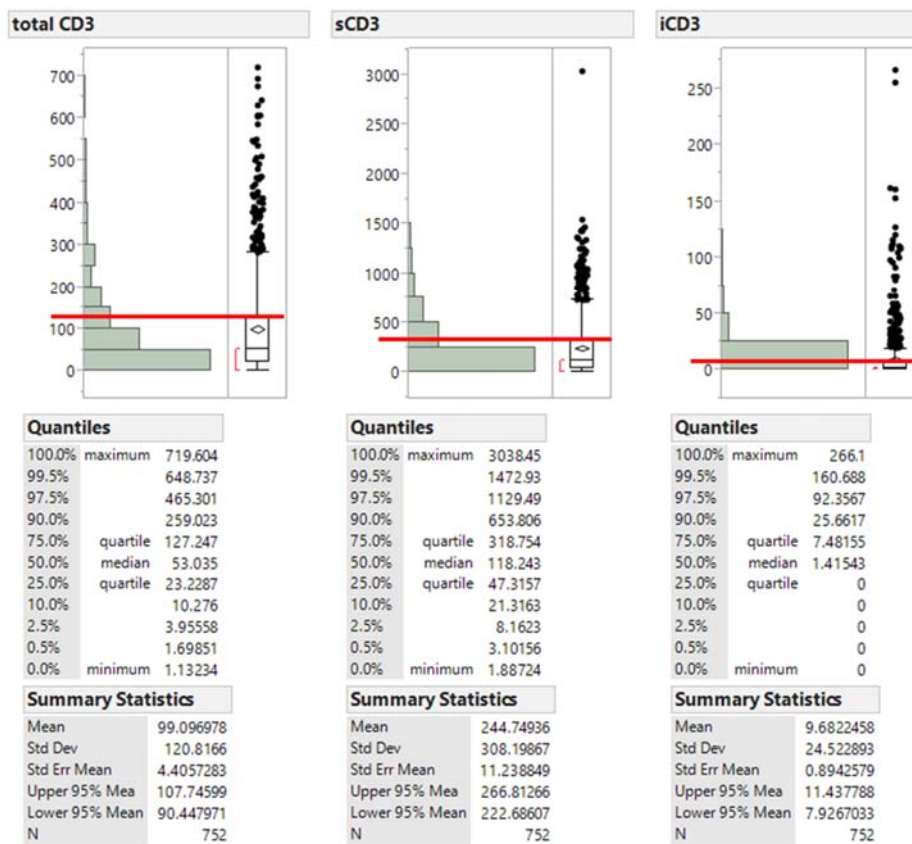

**total CD8**

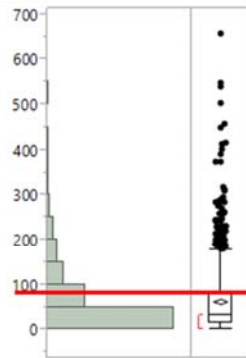

**Quantiles**

|        |          |         |
|--------|----------|---------|
| 100.0% | maximum  | 656.759 |
| 99.5%  |          | 485.624 |
| 97.5%  |          | 276.232 |
| 90.0%  |          | 158.23  |
| 75.0%  | quartile | 79.8301 |
| 50.0%  | median   | 32.3526 |
| 25.0%  | quartile | 13.7073 |
| 10.0%  |          | 5.66171 |
| 2.5%   |          | 1.41543 |
| 0.5%   |          | 0.56617 |
| 0.0%   | minimum  | 0       |

**Summary Statistics**

|                |           |
|----------------|-----------|
| Mean           | 61.998208 |
| Std Dev        | 78.085771 |
| Std Err Mean   | 2.6337677 |
| Upper 95% Mea  | 67.167423 |
| Lower 95% Mean | 56.828992 |
| N              | 879       |

**sCD8**

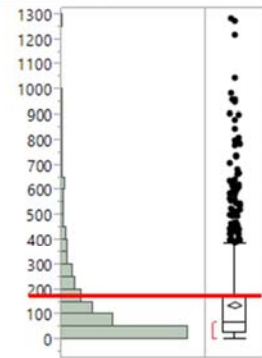

**Quantiles**

|        |          |         |
|--------|----------|---------|
| 100.0% | maximum  | 1283.32 |
| 99.5%  |          | 1022.51 |
| 97.5%  |          | 669.214 |
| 90.0%  |          | 358.103 |
| 75.0%  | quartile | 171.739 |
| 50.0%  | median   | 66.0533 |
| 25.0%  | quartile | 28.0989 |
| 10.0%  |          | 11.3234 |
| 2.5%   |          | 3.39703 |
| 0.5%   |          | 0.74815 |
| 0.0%   | minimum  | 0       |

**Summary Statistics**

|                |           |
|----------------|-----------|
| Mean           | 138.53289 |
| Std Dev        | 184.35633 |
| Std Err Mean   | 6.2181848 |
| Upper 95% Mea  | 150.73713 |
| Lower 95% Mean | 126.32865 |
| N              | 879       |

**iCD8**

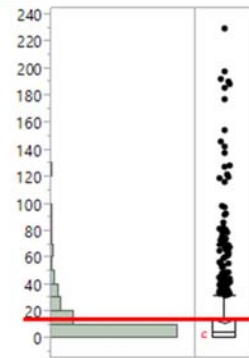

**Quantiles**

|        |          |         |
|--------|----------|---------|
| 100.0% | maximum  | 230.007 |
| 99.5%  |          | 189.533 |
| 97.5%  |          | 86.8129 |
| 90.0%  |          | 33.9703 |
| 75.0%  | quartile | 13.2107 |
| 50.0%  | median   | 4.11761 |
| 25.0%  | quartile | 0.80882 |
| 10.0%  |          | 0       |
| 2.5%   |          | 0       |
| 0.5%   |          | 0       |
| 0.0%   | minimum  | 0       |

**Summary Statistics**

|                |           |
|----------------|-----------|
| Mean           | 13.464118 |
| Std Dev        | 26.594906 |
| Std Err Mean   | 0.8970239 |
| Upper 95% Mea  | 15.22468  |
| Lower 95% Mean | 11.703557 |
| N              | 879       |

**total FOXP3**

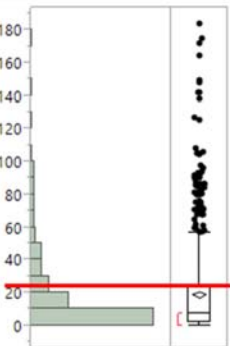

**Quantiles**

|        |          |         |
|--------|----------|---------|
| 100.0% | maximum  | 184.006 |
| 99.5%  |          | 167.639 |
| 97.5%  |          | 96.8404 |
| 90.0%  |          | 52.5659 |
| 75.0%  | quartile | 24.0623 |
| 50.0%  | median   | 7.64331 |
| 25.0%  | quartile | 1.99825 |
| 10.0%  |          | 0       |
| 2.5%   |          | 0       |
| 0.5%   |          | 0       |
| 0.0%   | minimum  | 0       |

**Summary Statistics**

|                |           |
|----------------|-----------|
| Mean           | 19.088608 |
| Std Dev        | 27.921534 |
| Std Err Mean   | 1.0471393 |
| Upper 95% Mea  | 21.144468 |
| Lower 95% Mean | 17.032748 |
| N              | 711       |

**sFOXP3**

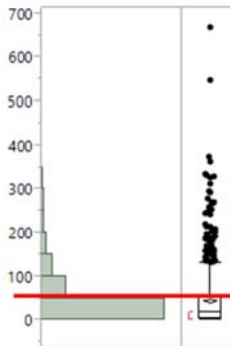

**Quantiles**

|        |          |         |
|--------|----------|---------|
| 100.0% | maximum  | 668.082 |
| 99.5%  |          | 450.773 |
| 97.5%  |          | 255.768 |
| 90.0%  |          | 118.896 |
| 75.0%  | quartile | 54.8751 |
| 50.0%  | median   | 17.4207 |
| 25.0%  | quartile | 4.24628 |
| 10.0%  |          | 0       |
| 2.5%   |          | 0       |
| 0.5%   |          | 0       |
| 0.0%   | minimum  | 0       |

**Summary Statistics**

|                |           |
|----------------|-----------|
| Mean           | 44.712114 |
| Std Dev        | 71.835749 |
| Std Err Mean   | 2.6940511 |
| Upper 95% Mea  | 50.001374 |
| Lower 95% Mean | 39.422854 |
| N              | 711       |

**iFOXP3**

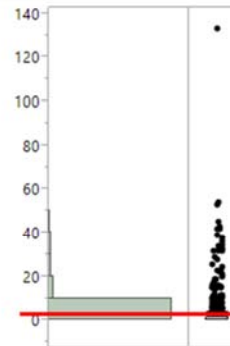

**Quantiles**

|        |          |         |
|--------|----------|---------|
| 100.0% | maximum  | 133.365 |
| 99.5%  |          | 48.6152 |
| 97.5%  |          | 29.5218 |
| 90.0%  |          | 7.97358 |
| 75.0%  | quartile | 1.41543 |
| 50.0%  | median   | 0       |
| 25.0%  | quartile | 0       |
| 10.0%  |          | 0       |
| 2.5%   |          | 0       |
| 0.5%   |          | 0       |
| 0.0%   | minimum  | 0       |

**Summary Statistics**

|                |           |
|----------------|-----------|
| Mean           | 2.8400989 |
| Std Dev        | 8.5244165 |
| Std Err Mean   | 0.3196906 |
| Upper 95% Mea  | 3.4677509 |
| Lower 95% Mean | 2.2124469 |
| N              | 711       |

**stromal TIL density (%)**

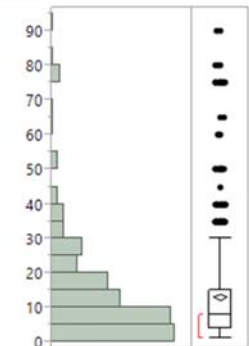

**Quantiles**

|        |          |      |
|--------|----------|------|
| 100.0% | maximum  | 90   |
| 99.5%  |          | 80   |
| 97.5%  |          | 71.5 |
| 90.0%  |          | 30   |
| 75.0%  | quartile | 15   |
| 50.0%  | median   | 8    |
| 25.0%  | quartile | 4    |
| 10.0%  |          | 2    |
| 2.5%   |          | 1    |
| 0.5%   |          | 1    |
| 0.0%   | minimum  | 1    |

**Summary Statistics**

|                |           |
|----------------|-----------|
| Mean           | 13.139335 |
| Std Dev        | 14.877608 |
| Std Err Mean   | 0.487071  |
| Upper 95% Mea  | 14.095218 |
| Lower 95% Mean | 12.183452 |
| N              | 933       |



Supplementary Figure S3: Lymphocytic subsets (counts/mm<sup>2</sup>) assessed as categorical variables (high/low) on patient disease-free survival (DFS) and overall survival (OS). Kaplan-Meier curves and log-rank test results are shown.

**A. CD3 markers in the entire cohort (DFS on the left, OS on the right; red circle: significant results)**

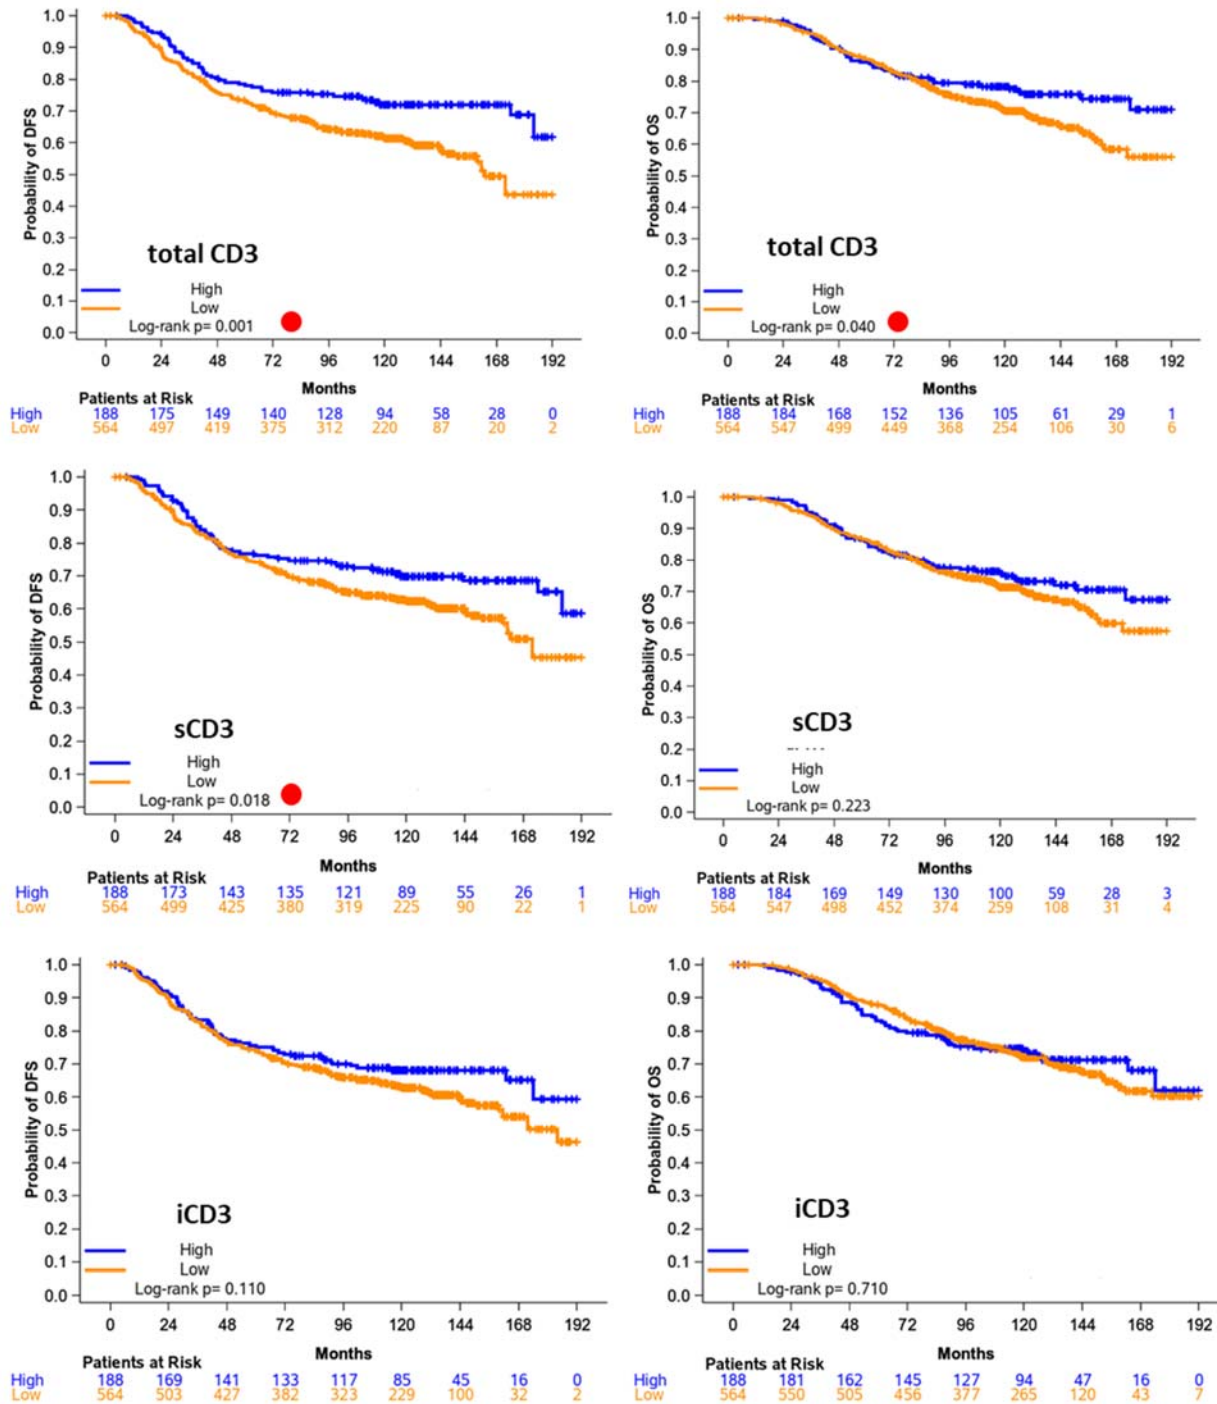

B. CD8 markers in the entire cohort (DFS on the left, OS on the right; red circle: significant results)

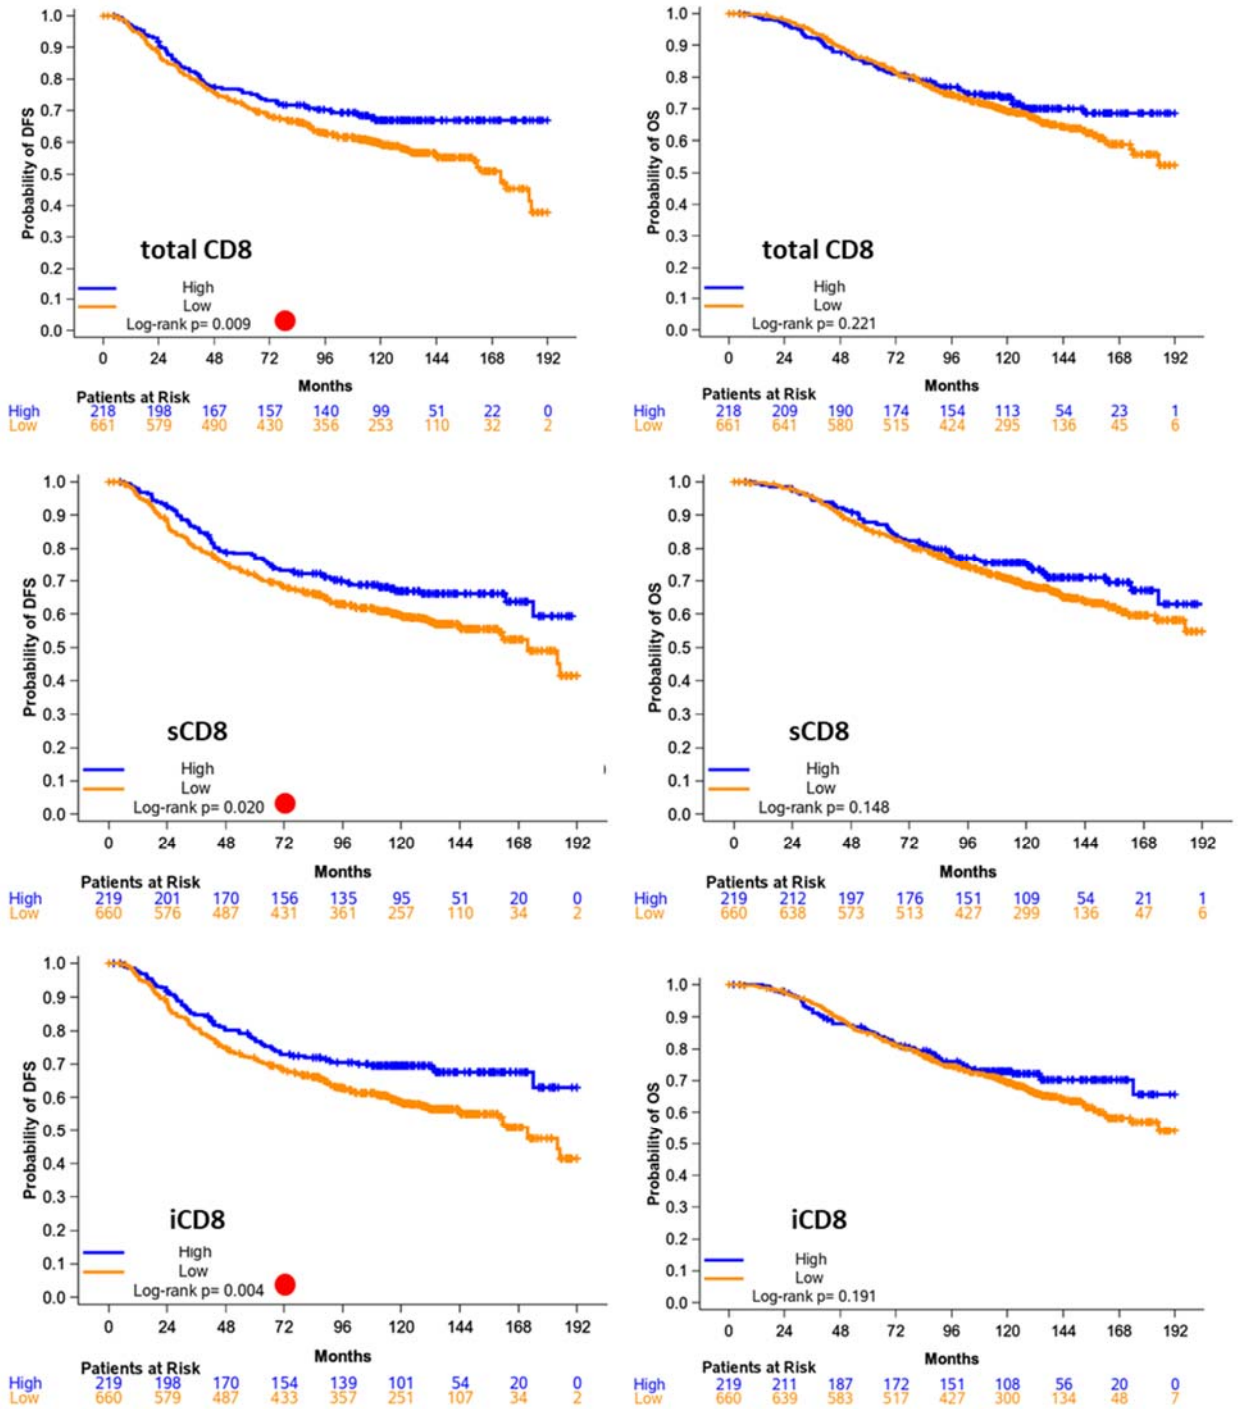

C. FOXP3 markers in the entire cohort (DFS on the left, OS on the right; red circle: significant results)

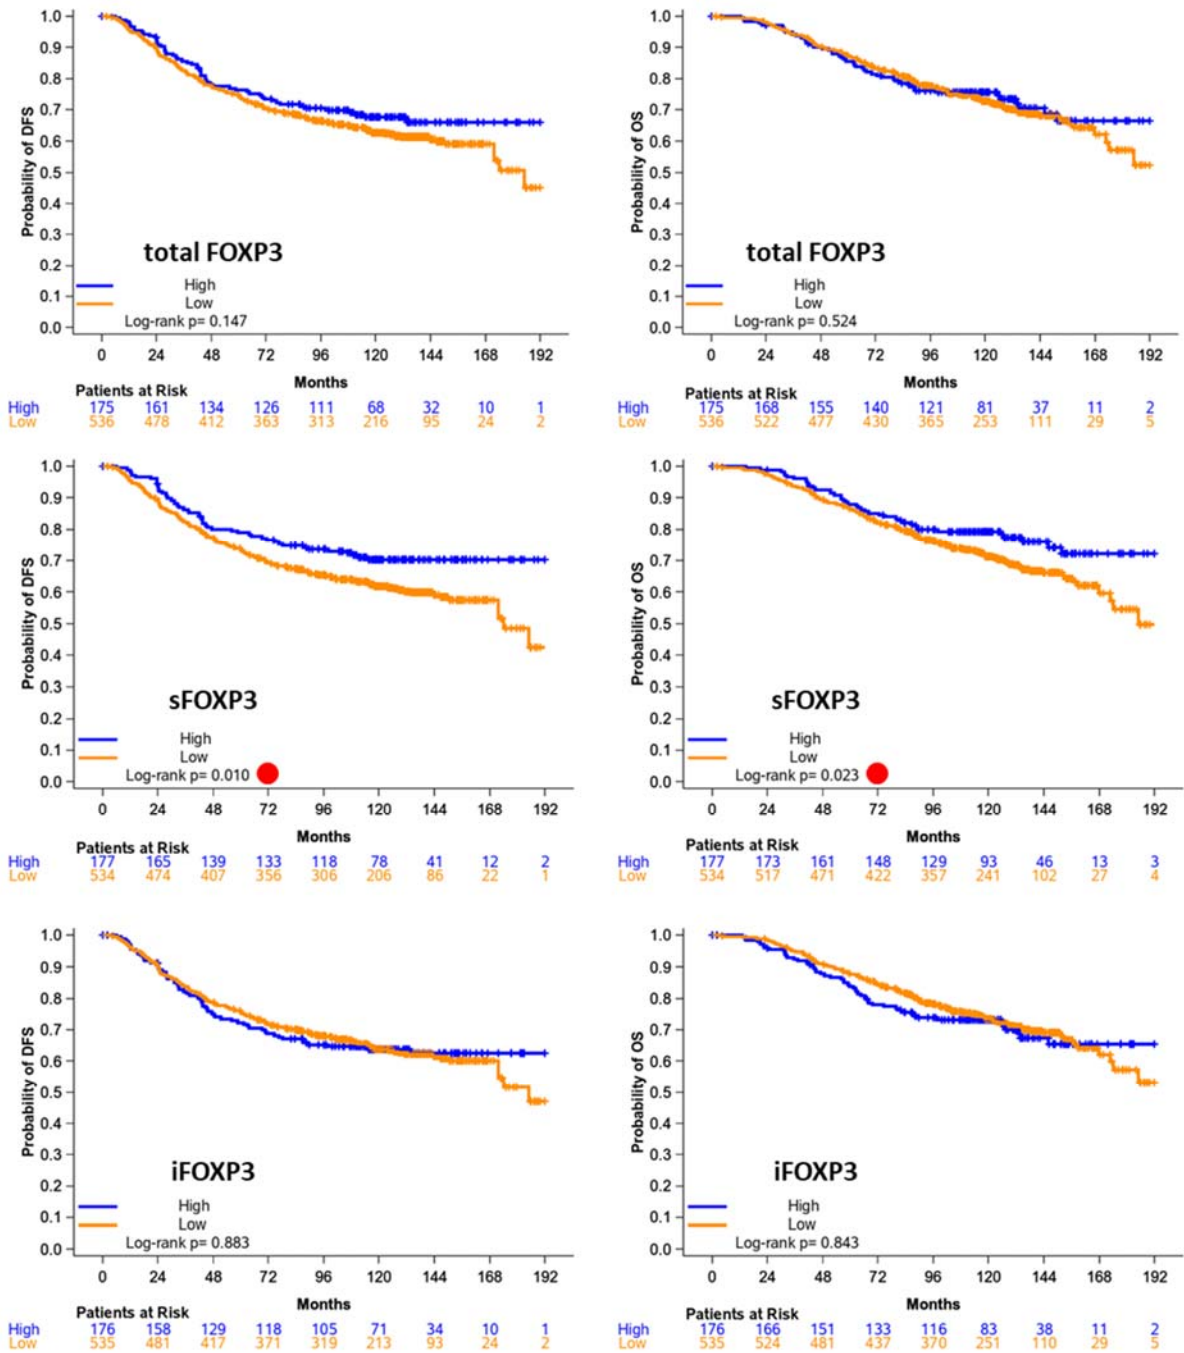

**D. Significant marker impact on the outcome of patients with luminal-B tumors**

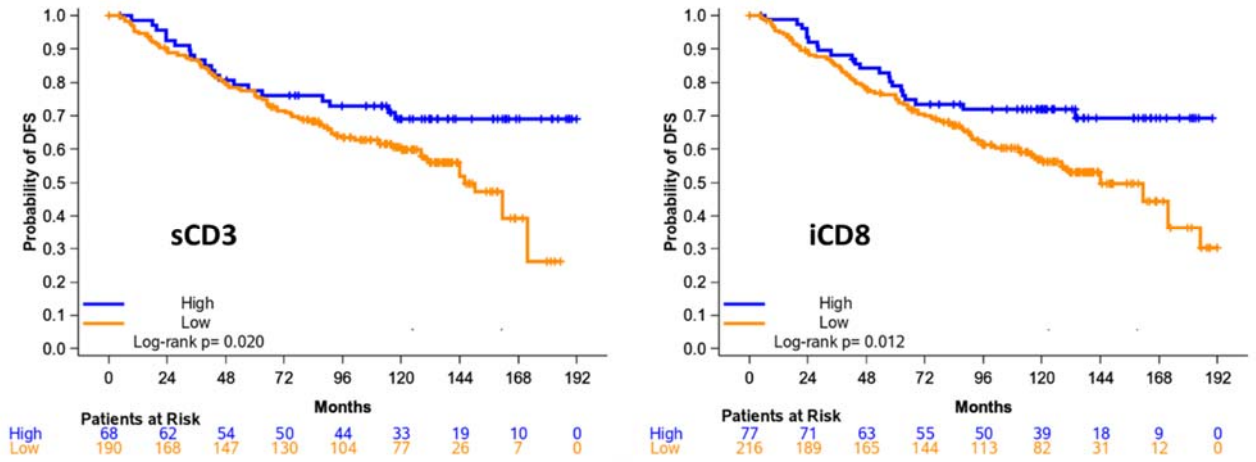

**E. Significant marker impact on the outcome of patients with TNBC**

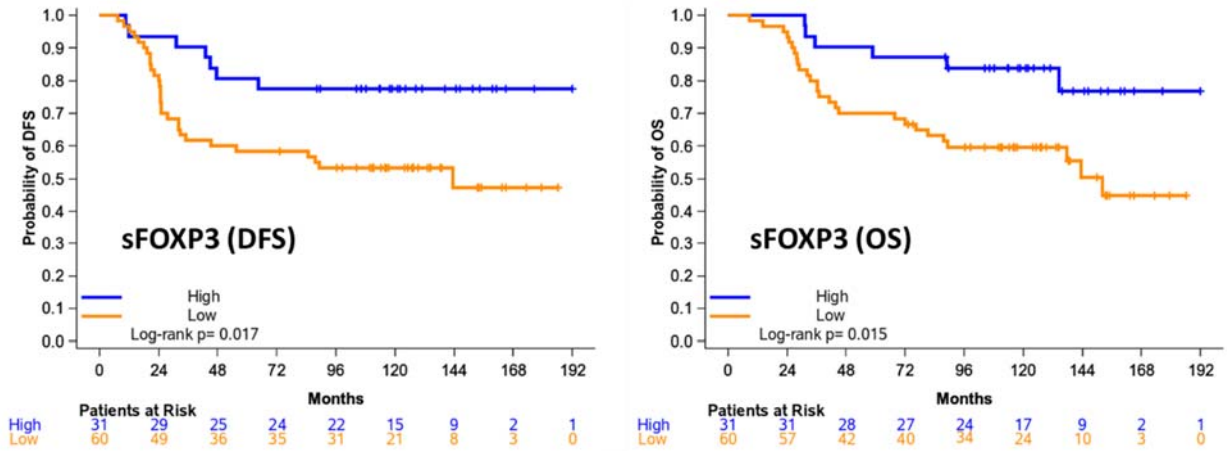



F. Significant marker impact on the outcome of patients with HER2-positive tumors, as indicated

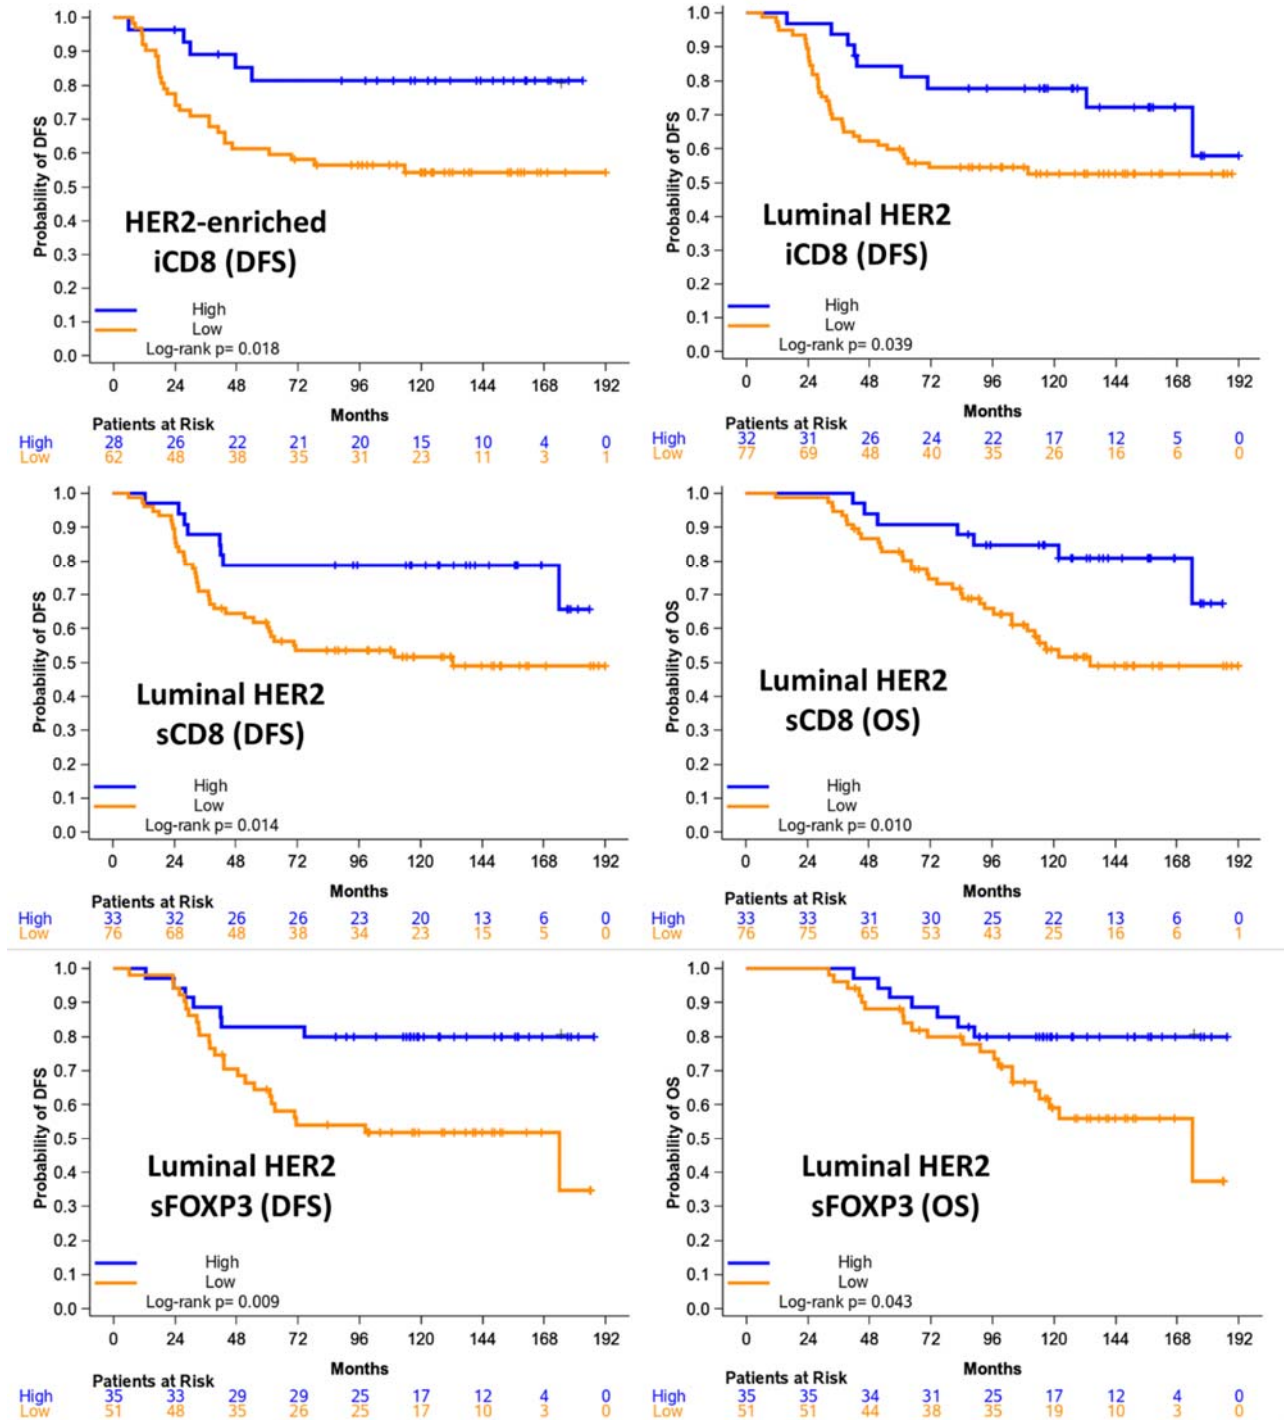

**Supplementary Table S1: Clinical trial characteristics.**

| Trial                                                                                         | Accrual period | N <sup>1</sup> | n <sup>2</sup> | Treatment schedule                                                                                                                                                                                                                                                                                                                                                                                                                                                                                                                                                                                                                                                                                                                                                                                                                                                                               | Eligibility criteria                                                                                                                                                                                                                                                     | References                                                                                                                                                                                                                                                                                                                 |
|-----------------------------------------------------------------------------------------------|----------------|----------------|----------------|--------------------------------------------------------------------------------------------------------------------------------------------------------------------------------------------------------------------------------------------------------------------------------------------------------------------------------------------------------------------------------------------------------------------------------------------------------------------------------------------------------------------------------------------------------------------------------------------------------------------------------------------------------------------------------------------------------------------------------------------------------------------------------------------------------------------------------------------------------------------------------------------------|--------------------------------------------------------------------------------------------------------------------------------------------------------------------------------------------------------------------------------------------------------------------------|----------------------------------------------------------------------------------------------------------------------------------------------------------------------------------------------------------------------------------------------------------------------------------------------------------------------------|
| <p>HE10/97</p> <p>Australian New Zealand Clinical Trials Registry<br/>ACTRN12611000506998</p> | 1997 - 2000    | 595            | 265            | <p><b>E-T-CMF:</b> Epirubicin 110 mg/m<sup>2</sup> q 2 weeks x 3 followed by paclitaxel 250 mg/m<sup>2</sup> q 2 weeks x 3 followed by cyclophosphamide 840 mg/m<sup>2</sup>, methotrexate 57 mg/m<sup>2</sup>, fluorouracil 840 mg/m<sup>2</sup> (CMF) q 2 weeks x 3. GCSF support in all cycles.</p> <p><b>E-CMF:</b> Epirubicin 110 mg/m<sup>2</sup> q 2 weeks x 4 followed by CMF q 2 weeks x 4. GCSF support in all cycles.</p> <p>Patients with ER/PgR-positive tumors received tamoxifen 20 mg daily for five years. Premenopausal patients received additional treatment with an LH-RH analog for two years. All patients who underwent partial mastectomy or with tumors &gt;5 cm and/or with ≥4 infiltrated axillary nodes, irrespectively of the type of surgery, were irradiated. Radiation therapy and hormonal therapy were administered after the completion of chemotherapy.</p> | <p>Eligible were women with: histologically confirmed epithelial breast cancer; pathological stage T1-3 N1 M0 or T3 N0 M0; Eastern Cooperative Oncology Group performance status 0-1; normal cardiac function; and adequate bone marrow, hepatic and renal function.</p> | <p>Fountzilas G, Skarlos D, et al. Postoperative dose-dense sequential chemotherapy with epirubicin, followed by CMF with or without paclitaxel, in patients with high-risk operable breast cancer: a randomized phase III study conducted by the Hellenic Cooperative Oncology Group. Ann Oncol. 2005;16(11):1762-71.</p> |
| <p>HE10/00</p> <p>Australian New Zealand Clinical Trials Registry<br/>ACTRN12609001036202</p> | 2000 - 2005    | 1,086          | 746            | <p><b>E-T-CMF:</b> As in the HE10/97 trial.</p> <p><b>ET-CMF:</b> Epirubicin 83 mg/m<sup>2</sup> + paclitaxel 187 mg/m<sup>2</sup> q 3 weeks x 4 followed by cyclophosphamide 840 mg/m<sup>2</sup>, methotrexate 57 mg/m<sup>2</sup>, fluorouracil 840 mg/m<sup>2</sup> (CMF) q 2 weeks x 3. GCSF support in all cycles.</p> <p>Premenopausal patients received hormonal therapy as in the HE10/97 trial. Postmenopausal patients received tamoxifen 20 mg daily for 2-3 years followed 2-3 years of daily examestane 25 mg. Criteria for irradiation were the same as in the HE10/97 trial.</p>                                                                                                                                                                                                                                                                                                 | <p>Eligible were women with: histologically confirmed epithelial breast cancer; pathological stage T1-4 N1-2 M0; Eastern Cooperative Oncology Group performance status 0-1; normal cardiac function; and adequate bone marrow, hepatic and renal function.</p>           | <p>Gogas H, Dafni U, et al. Postoperative dose-dense sequential versus concomitant administration of epirubicin and paclitaxel in patients with node-positive breast cancer: 5-year results of the Hellenic Cooperative Oncology Group HE 10/00 phase III Trial. Breast Cancer Res Treat. 2012;132(2):609-19.</p>          |

<sup>1</sup>N, number of patients enrolled in the trials; <sup>2</sup>n, number of patients included in the current study with tumor tissue blocks available.

**Supplementary Table S2: Antibodies and staining conditions for CD3, CD8 and FOXP3 immunohistochemistry.**

| <b>Protein</b>                  | <b>CD3*</b>        | <b>CD8**</b>    | <b>FOXP3***</b> |
|---------------------------------|--------------------|-----------------|-----------------|
| <b>Antibody clone</b>           | PS1                | C8/144B         | SP97            |
| <b>Source</b>                   | mouse              | mouse           | rabbit          |
| <b>Antibody dilution</b>        | 1:180              | 1:60            | 1:80            |
| <b>Antigen retrieval / 98°C</b> | Citric acid 20'min | EDTA 20'min     | EDTA 20'min     |
| <b>Antibody incubation</b>      | 20'min             | 20'min          | 20'min          |
| <b>Staining system</b>          | Polymer HRP/DAB    | Polymer HRP/DAB | Polymer HRP/DAB |

\*: Novocastra/Leica Biosystems, Newcastle, UK; \*\*: Dako, Glostrup, Denmark; \*\*\*: Spring Bioscience, Fremont, CA.

**Supplementary Table S3: Spearman correlations among continuous lymphocytic markers.**

**A. Spearman's rho values for all IHC CD3, CD8, FOXP3 and TIL density, stromal (s) and intraepithelial (i)**

|              | sCD3 | iCD3  | sCD8         | iCD8         | sFOXP3 | iFOXP3       | sTIL density |
|--------------|------|-------|--------------|--------------|--------|--------------|--------------|
| sCD3         | 1    | 0.591 | <b>0.883</b> | 0.575        | 0.497  | 0.394        | 0.445        |
| iCD3         |      | 1     | 0.557        | <b>0.659</b> | 0.422  | 0.402        | 0.34         |
| sCD8         |      |       | 1            | 0.585        | 0.521  | 0.349        | 0.463        |
| iCD8         |      |       |              | 1            | 0.428  | 0.448        | 0.378        |
| sFOXP3       |      |       |              |              | 1      | <b>0.633</b> | 0.469        |
| iFOXP3       |      |       |              |              |        | 1            | 0.358        |
| sTIL density |      |       |              |              |        |              | 1            |

**B. Spearman's rho values for total IHC and mRNA expression values**

|             | Total CD3 | Total CD8    | Total FOXP3 | CD3 mRNA | CD8 mRNA     | FOXP3 mRNA   |
|-------------|-----------|--------------|-------------|----------|--------------|--------------|
| Total CD3   | 1         | <b>0.884</b> | 0.463       | 0.369    | 0.33         | 0.323        |
| Total CD8   |           | 1            | 0.496       | 0.429    | 0.382        | 0.368        |
| Total FOXP3 |           |              | 1           | 0.377    | 0.275        | 0.384        |
| CD3 mRNA    |           |              |             | 1        | <b>0.694</b> | <b>0.647</b> |
| CD8 mRNA    |           |              |             |          | 1            | <b>0.609</b> |
| FOXP3 mRNA  |           |              |             |          |              | 1            |

Note: rho values indicating strong correlations are shown in bold

**Supplementary Table S4: Associations of CD3, CD8, FOXP3 and sTIL density with clinicopathological parameters.**

|                   | CD3        |                 | sCD3            |                  | p-value         | iCD3            |                  | p-value         | Total CD3       |                  | p-value |
|-------------------|------------|-----------------|-----------------|------------------|-----------------|-----------------|------------------|-----------------|-----------------|------------------|---------|
|                   | N(%)       | Low             | High            | Low              |                 | High            | Low              |                 | High            |                  |         |
| Age               | 752        | 51.9(22.3,79.3) | 53.9(23.8,76.9) | 0.33             | 52.3(22.3,79.3) | 52.9(23.8,76.9) | 0.97             | 52.4(22.3,79.3) | 52.6(23.8,77.1) | 0.46             |         |
| Ki67              | 727        | 20.0(0.00,95.0) | 35.0(1.00,98.0) | <b>&lt;0.001</b> | 25.0(0.00,95.0) | 33.5(2.0,98.0)  | <b>&lt;0.001</b> | 20.0(0.00,95.0) | 35.0(1.00,98.0) | <b>&lt;0.001</b> |         |
| Age (categorical) | 752(100.0) |                 |                 | 0.070            |                 |                 | 0.64             |                 |                 | 0.97             |         |
| ≤52.7             | 383(50.9)  | 298(52.8)       | 85(45.2)        |                  | 290(51.4)       | 93(49.5)        |                  | 287(50.9)       | 96(51.1)        |                  |         |
| >52.7             | 369(49.1)  | 266(47.2)       | 103(54.8)       |                  | 274(48.6)       | 95(50.5)        |                  | 277(49.1)       | 92(48.9)        |                  |         |
| Menopausal status | 752(100.0) |                 |                 | 0.13             |                 |                 | 0.87             |                 |                 | 0.87             |         |
| Postmenopausal    | 400(53.2)  | 291(51.6)       | 109(58.0)       |                  | 301(53.4)       | 99(52.7)        |                  | 301(53.4)       | 99(52.7)        |                  |         |
| Premenopausal     | 352(46.8)  | 273(48.4)       | 79(42.0)        |                  | 263(46.6)       | 89(47.3)        |                  | 263(46.6)       | 89(47.3)        |                  |         |
| Tumor size        | 752(100.0) |                 |                 | 0.26             |                 |                 | 0.60             |                 |                 | <b>0.035</b>     |         |
| ≤2                | 224(29.8)  | 160(28.4)       | 64(34.0)        |                  | 163(28.9)       | 61(32.4)        |                  | 154(27.3)       | 70(37.2)        |                  |         |
| 2-5               | 431(57.3)  | 327(58.0)       | 104(55.3)       |                  | 329(58.3)       | 102(54.3)       |                  | 334(59.2)       | 97(51.6)        |                  |         |
| >5                | 97(12.9)   | 77(13.7)        | 20(10.6)        |                  | 72(12.8)        | 25(13.3)        |                  | 76(13.5)        | 21(11.2)        |                  |         |
| Nodal status      | 752(100.0) |                 |                 | 0.80             |                 |                 | 0.14             |                 |                 | 0.93             |         |
| 0-3               | 302(40.2)  | 225(39.9)       | 77(41.0)        |                  | 218(38.7)       | 84(44.7)        |                  | 227(40.2)       | 75(39.9)        |                  |         |
| ≥4                | 450(59.8)  | 339(60.1)       | 111(59.0)       |                  | 346(61.3)       | 104(55.3)       |                  | 337(59.8)       | 113(60.1)       |                  |         |
| Grade             | 750(100.0) |                 |                 | <b>&lt;0.001</b> |                 |                 | <b>&lt;0.001</b> |                 |                 | <b>0.001</b>     |         |
| I-II              | 365(48.7)  | 294(52.3)       | 71(37.8)        |                  | 299(53.2)       | 66(35.1)        |                  | 293(52.1)       | 72(38.3)        |                  |         |
| III-IV            | 385(51.3)  | 268(47.7)       | 117(62.2)       |                  | 263(46.8)       | 122(64.9)       |                  | 269(47.9)       | 116(61.7)       |                  |         |
| ER/PgR status     | 735(100.0) |                 |                 | <b>0.009</b>     |                 |                 | <b>0.001</b>     |                 |                 | 0.083            |         |
| Negative          | 164(22.3)  | 110(20.0)       | 54(29.2)        |                  | 107(19.5)       | 57(30.8)        |                  | 114(20.8)       | 50(26.9)        |                  |         |
| Positive          | 571(77.7)  | 440(80.0)       | 131(70.8)       |                  | 443(80.5)       | 128(69.2)       |                  | 435(79.2)       | 136(73.1)       |                  |         |
| HER2 status       | 742(100.0) |                 |                 | <b>0.003</b>     |                 |                 | <b>0.038</b>     |                 |                 | <b>0.004</b>     |         |
| Negative          | 569(76.7)  | 441(79.3)       | 128(68.8)       |                  | 436(78.6)       | 133(71.1)       |                  | 440(79.3)       | 129(69.0)       |                  |         |
| Positive          | 173(23.3)  | 115(20.7)       | 58(31.2)        |                  | 119(21.4)       | 54(28.9)        |                  | 115(20.7)       | 58(31.0)        |                  |         |
| Subtypes          | 728(100.0) |                 |                 | <b>&lt;0.001</b> |                 |                 | <b>&lt;0.001</b> |                 |                 | <b>&lt;0.001</b> |         |
| Luminal A         | 209(28.7)  | 180(86.1)       | 29(13.9)        |                  | 174(83.3)       | 35(16.7)        |                  | 180(86.1)       | 29(13.9)        |                  |         |
| Luminal B         | 258(35.4)  | 190(73.6)       | 68(26.4)        |                  | 197(76.4)       | 61(23.6)        |                  | 190(73.6)       | 68(26.4)        |                  |         |
| Luminal HER2      | 97(13.3)   | 64(66.0)        | 33(34.0)        |                  | 66(68.0)        | 31(32.0)        |                  | 59(60.8)        | 38(39.2)        |                  |         |
| HER2-enriched     | 73(10.0)   | 48(65.8)        | 25(34.2)        |                  | 51(69.9)        | 22(30.1)        |                  | 53(72.6)        | 20(27.4)        |                  |         |
| TNBC              | 91(12.5)   | 62(68.1)        | 29(31.9)        |                  | 56(61.5)        | 35(38.5)        |                  | 61(67.0)        | 30(33.0)        |                  |         |
|                   | CD8        |                 | sCD8            |                  | p-value         | iCD8            |                  | p-value         | Total CD8       |                  | p-value |
|                   | N(%)       | Low             | High            | Low              |                 | High            | Low              |                 | High            |                  |         |
| Age               | 879        | 52.3(22.3,79.3) | 53.5(23.8,76.9) | 0.99             | 52.3(22.3,79.3) | 53.4(23.8,76.9) | 0.49             | 52.4(22.3,79.3) | 53.1(23.8,77.1) | 0.38             |         |
| Ki67              | 831        | 25.0(0.00,95.0) | 35.0(1.00,98.0) | <b>&lt;0.001</b> | 25.0(0.00,98.0) | 35.0(1.00,98.0) | <b>&lt;0.001</b> | 23.8(0.00,95.0) | 35.0(1.00,98.0) | <b>&lt;0.001</b> |         |
| Age (categorical) | 879(100.0) |                 |                 | 0.19             |                 |                 | 0.19             |                 |                 | 0.65             |         |
| ≤52.7             | 443(50.4)  | 341(51.7)       | 102(46.6)       |                  | 341(51.7)       | 102(46.6)       |                  | 336(50.8)       | 107(49.1)       |                  |         |
| >52.7             | 436(49.6)  | 319(48.3)       | 117(53.4)       |                  | 319(48.3)       | 117(53.4)       |                  | 325(49.2)       | 111(50.9)       |                  |         |
| Menopausal status | 879(100.0) |                 |                 | 0.80             |                 |                 | 0.57             |                 |                 | 0.78             |         |
| Postmenopausal    | 471(53.6)  | 352(53.3)       | 119(54.3)       |                  | 350(53.0)       | 121(55.3)       |                  | 356(53.9)       | 115(52.8)       |                  |         |
| Premenopausal     | 408(46.4)  | 308(46.7)       | 100(45.7)       |                  | 310(47.0)       | 98(44.7)        |                  | 305(46.1)       | 103(47.2)       |                  |         |
| Tumor size        | 879(100.0) |                 |                 | <b>0.041</b>     |                 |                 | 0.99             |                 |                 | 0.21             |         |
| ≤2                | 255(29.0)  | 177(26.8)       | 78(35.6)        |                  | 191(28.9)       | 64(29.2)        |                  | 183(27.7)       | 72(33.0)        |                  |         |
| 2-5               | 514(58.5)  | 396(60.0)       | 118(53.9)       |                  | 386(58.5)       | 128(58.4)       |                  | 390(59.0)       | 124(56.9)       |                  |         |
| >5                | 110(12.5)  | 87(13.2)        | 23(10.5)        |                  | 83(12.6)        | 27(12.3)        |                  | 88(13.3)        | 22(10.1)        |                  |         |
| Nodal status      | 879(100.0) |                 |                 | 0.34             |                 |                 | 0.76             |                 |                 | 0.82             |         |
| 0-3               | 353(40.2)  | 259(39.2)       | 94(42.9)        |                  | 267(40.5)       | 86(39.3)        |                  | 264(39.9)       | 89(40.8)        |                  |         |
| ≥4                | 526(59.8)  | 401(60.8)       | 125(57.1)       |                  | 393(59.5)       | 133(60.7)       |                  | 397(60.1)       | 129(59.2)       |                  |         |
| Grade             | 876(100.0) |                 |                 | <b>&lt;0.001</b> |                 |                 | <b>&lt;0.001</b> |                 |                 | <b>0.001</b>     |         |
| I-II              | 429(49.0)  | 345(52.5)       | 84(38.4)        |                  | 351(53.4)       | 78(35.6)        |                  | 343(52.1)       | 86(39.4)        |                  |         |
| III-IV            | 447(51.0)  | 312(47.5)       | 135(61.6)       |                  | 306(46.6)       | 141(64.4)       |                  | 315(47.9)       | 132(60.6)       |                  |         |
| ER/PgR status     | 844(100.0) |                 |                 | <b>0.009</b>     |                 |                 | <b>0.004</b>     |                 |                 | <b>0.006</b>     |         |
| Negative          | 199(23.6)  | 136(21.4)       | 63(30.3)        |                  | 134(21.1)       | 65(31.0)        |                  | 135(21.3)       | 64(30.6)        |                  |         |
| Positive          | 645(76.4)  | 500(78.6)       | 145(69.7)       |                  | 500(78.9)       | 145(69.0)       |                  | 500(78.7)       | 145(69.4)       |                  |         |
| HER2 status       | 854(100.0) |                 |                 | 0.067            |                 |                 | 0.061            |                 |                 | <b>0.002</b>     |         |
| Negative          | 650(76.1)  | 500(77.6)       | 150(71.4)       |                  | 498(77.7)       | 152(71.4)       |                  | 506(78.7)       | 144(68.2)       |                  |         |
| Positive          | 204(23.9)  | 144(22.4)       | 60(28.6)        |                  | 143(22.3)       | 61(28.6)        |                  | 137(21.3)       | 67(31.8)        |                  |         |
| Subtypes          | 833(100.0) |                 |                 | <b>&lt;0.001</b> |                 |                 | <b>&lt;0.001</b> |                 |                 | <b>&lt;0.001</b> |         |
| Luminal A         | 232(27.9)  | 203(87.5)       | 29(12.5)        |                  | 198(85.3)       | 34(14.7)        |                  | 201(86.6)       | 31(13.4)        |                  |         |
| Luminal B         | 293(35.2)  | 213(72.7)       | 80(27.3)        |                  | 216(73.7)       | 77(26.3)        |                  | 218(74.4)       | 75(25.6)        |                  |         |
| Luminal HER2      | 109(13.1)  | 76(69.7)        | 33(30.3)        |                  | 77(70.6)        | 32(29.4)        |                  | 73(67.0)        | 36(33.0)        |                  |         |
| HER2-enriched     | 90(10.8)   | 64(71.1)        | 26(28.9)        |                  | 62(68.9)        | 28(31.1)        |                  | 60(66.7)        | 30(33.3)        |                  |         |
| TNBC              | 109(13.1)  | 72(66.1)        | 37(33.9)        |                  | 72(66.1)        | 37(33.9)        |                  | 75(68.8)        | 34(31.2)        |                  |         |
|                   | FOXP3      |                 | sFOXP3          |                  | p-value         | iFOXP3          |                  | p-value         | Total FOXP3     |                  | p-value |
|                   | N(%)       | Low             | High            | Low              |                 | High            | Low              |                 | High            |                  |         |
| Age               | 711        | 52.5(24.5,78.9) | 52.9(22.3,76.9) | 0.36             | 52.8(24.5,78.9) | 51.3(22.3,76.9) | 0.04             | 52.4(27.5,78.9) | 53.1(22.3,76.9) | 0.21             |         |
| Ki67              | 681        | 20.0(0.00,95.0) | 35.0(2.0,98.0)  | <b>&lt;0.001</b> | 20.0(0.00,95.0) | 37.0(5.0,98.0)  | <b>&lt;0.001</b> | 20.0(0.00,95.0) | 37.0(5.0,98.0)  | <b>&lt;0.001</b> |         |
| Age (categorical) | 711(100.0) |                 |                 | 0.78             |                 |                 | 0.50             |                 |                 | 0.53             |         |
| ≤52.7             | 360(50.6)  | 272(50.9)       | 88(49.7)        |                  | 267(49.9)       | 93(52.8)        |                  | 275(51.3)       | 85(48.6)        |                  |         |
| >52.7             | 351(49.4)  | 262(49.1)       | 89(50.3)        |                  | 268(50.1)       | 83(47.2)        |                  | 261(48.7)       | 90(51.4)        |                  |         |
| Menopausal status | 711(100.0) |                 |                 | 0.92             |                 |                 | 0.48             |                 |                 | 0.54             |         |
| Postmenopausal    | 388(54.6)  | 292(54.7)       | 96(54.2)        |                  | 296(55.3)       | 92(52.3)        |                  | 296(55.2)       | 92(52.6)        |                  |         |
| Premenopausal     | 323(45.4)  | 242(45.3)       | 81(45.8)        |                  | 239(44.7)       | 84(47.7)        |                  | 240(44.8)       | 83(47.4)        |                  |         |
| Tumor size        | 711(100.0) |                 |                 | 0.66             |                 |                 | 0.49             |                 |                 | 0.84             |         |



|                      |             |           |           |                  |           |           |                  |           |           |                  |
|----------------------|-------------|-----------|-----------|------------------|-----------|-----------|------------------|-----------|-----------|------------------|
| ≤2                   | 205(28.8)   | 152(28.5) | 53(29.9)  |                  | 149(27.9) | 56(31.8)  |                  | 153(28.5) | 52(29.7)  |                  |
| 2-5                  | 416(58.5)   | 311(58.2) | 105(59.3) |                  | 315(58.9) | 101(57.4) |                  | 313(58.4) | 103(58.9) |                  |
| >5                   | 90(12.7)    | 71(13.3)  | 19(10.7)  |                  | 71(13.3)  | 19(10.8)  |                  | 70(13.1)  | 20(11.4)  |                  |
| <b>Nodal status</b>  | 711 (100.0) |           |           | <b>0.007</b>     |           |           | 0.17             |           |           | <b>0.049</b>     |
| 0-3                  | 292(41.1)   | 204(38.2) | 88(49.7)  |                  | 212(39.6) | 80(45.5)  |                  | 209(39.0) | 83(47.4)  |                  |
| ≥4                   | 419(58.9)   | 330(61.8) | 89(50.3)  |                  | 323(60.4) | 96(54.5)  |                  | 327(61.0) | 92(52.6)  |                  |
| <b>Grade</b>         | 709 (100.0) |           |           | <b>&lt;0.001</b> |           |           | <b>&lt;0.001</b> |           |           | <b>&lt;0.001</b> |
| I-II                 | 364(51.3)   | 304(57.1) | 60(33.9)  |                  | 298(55.9) | 66(37.5)  |                  | 299(56.0) | 65(37.1)  |                  |
| III-IV               | 345(48.7)   | 228(42.9) | 117(66.1) |                  | 235(44.1) | 110(62.5) |                  | 235(44.0) | 110(62.9) |                  |
| <b>ER/PgR status</b> | 691 (100.0) |           |           | <b>&lt;0.001</b> |           |           | <b>0.009</b>     |           |           | <b>0.003</b>     |
| Negative             | 166(24.0)   | 107(20.6) | 59(34.5)  |                  | 112(21.6) | 54(31.4)  |                  | 111(21.3) | 55(32.4)  |                  |
| Positive             | 525(76.0)   | 413(79.4) | 112(65.5) |                  | 407(78.4) | 118(68.6) |                  | 410(78.7) | 115(67.6) |                  |
| <b>HER2 status</b>   | 701 (100.0) |           |           | <b>&lt;0.001</b> |           |           | <b>0.020</b>     |           |           | <b>&lt;0.001</b> |
| Negative             | 536(76.5)   | 427(81.0) | 109(62.6) |                  | 415(78.6) | 121(69.9) |                  | 424(80.2) | 112(65.1) |                  |
| Positive             | 165(23.5)   | 100(19.0) | 65(37.4)  |                  | 113(21.4) | 52(30.1)  |                  | 105(19.8) | 60(34.9)  |                  |
| <b>Subtypes</b>      | 683 (100.0) |           |           | <b>&lt;0.001</b> |           |           | <b>&lt;0.001</b> |           |           | <b>&lt;0.001</b> |
| Luminal A            | 209(30.6)   | 191(91.4) | 18(8.6)   |                  | 185(88.5) | 24(11.5)  |                  | 187(89.5) | 22(10.5)  |                  |
| Luminal B            | 222(32.5)   | 164(73.9) | 58(26.1)  |                  | 158(71.2) | 64(28.8)  |                  | 161(72.5) | 61(27.5)  |                  |
| Luminal HER2         | 86(12.6)    | 51(59.3)  | 35(40.7)  |                  | 57(66.3)  | 29(33.7)  |                  | 55(64.0)  | 31(36.0)  |                  |
| HER2-enriched        | 75(11.0)    | 47(62.7)  | 28(37.3)  |                  | 53(70.7)  | 22(29.3)  |                  | 48(64.0)  | 27(36.0)  |                  |
| TNBC                 | 91(13.3)    | 60(65.9)  | 31(34.1)  |                  | 59(64.8)  | 32(35.2)  |                  | 63(69.2)  | 28(30.8)  |                  |

|                          | stromal TIL density |             |        |           |                  | CLUSTERS    |                 |                 |                  |
|--------------------------|---------------------|-------------|--------|-----------|------------------|-------------|-----------------|-----------------|------------------|
|                          | N                   | Mean±std    | Median | min - max | p-value          | N           | Low (clstr 1)   | High (clstr 2)  | p-value          |
| <b>Age</b>               |                     |             |        |           |                  | 511         | 52.1(24.5,78.9) | 54.2(22.3,76.9) | 0.77             |
| <b>Ki67</b>              |                     |             |        |           |                  | 499         | 20.0(0.00,95.0) | 40.0(1.00,98.0) | <b>&lt;0.001</b> |
| <b>Age (categorical)</b> | 933                 |             |        |           | 0.43             | 511 (100.0) |                 |                 | 0.37             |
| ≤52.7                    | 468                 | 13.05±14.65 | 10     | 1 to 90   |                  | 261(51.1)   | 212(52.1)       | 49(47.1)        |                  |
| >52.7                    | 465                 | 13.23±15.12 | 8      | 1 to 90   |                  | 250(48.9)   | 195(47.9)       | 55(52.9)        |                  |
| <b>Menopausal status</b> | 933                 |             |        |           | 0.52             | 511 (100.0) |                 |                 | 0.86             |
| Postmenopausal           | 505                 | 12.82±14.13 | 8      | 1 to 90   |                  | 276(54.0)   | 219(53.8)       | 57(54.8)        |                  |
| Premenopausal            | 428                 | 13.51±15.73 | 9      | 1 to 90   |                  | 235(46.0)   | 188(46.2)       | 47(45.2)        |                  |
| <b>Tumor size</b>        | 933                 |             |        |           | <b>0.005</b>     | 511 (100.0) |                 |                 | 0.27             |
| ≤2                       | 275                 | 15.16±17.34 | 10     | 1 to 90   |                  | 298(58.3)   | 241(59.2)       | 57(54.8)        |                  |
| 2-5                      | 541                 | 12.66±13.6  | 10     | 1 to 90   |                  | 146(28.6)   | 110(27.0)       | 36(34.6)        |                  |
| >5                       | 117                 | 10.62±13.8  | 5      | 1 to 90   |                  | 67(13.1)    | 56(13.8)        | 11(10.6)        |                  |
| <b>Nodal status</b>      | 933                 |             |        |           | 0.34             | 511 (100.0) |                 |                 | 0.34             |
| 0-3                      | 385                 | 12.95±13.69 | 8      | 1 to 90   |                  | 210(41.1)   | 163(40.0)       | 47(45.2)        |                  |
| ≥4                       | 548                 | 13.27±15.67 | 8      | 1 to 90   |                  | 301(58.9)   | 244(60.0)       | 57(54.8)        |                  |
| <b>Grade</b>             | 929                 |             |        |           | <b>&lt;0.001</b> | 510 (100.0) |                 |                 | <b>&lt;0.001</b> |
| I-II                     | 463                 | 11.04±14.03 | 5      | 1 to 90   |                  | 257(50.4)   | 221(54.4)       | 36(34.6)        |                  |
| III-IV                   | 466                 | 15.27±15.44 | 10     | 1 to 90   |                  | 253(49.6)   | 185(45.6)       | 68(65.4)        |                  |
| <b>ER/PgR status</b>     | 887                 |             |        |           | <b>&lt;0.001</b> | 502 (100.0) |                 |                 | 0.40             |
| Negative                 | 208                 | 17.73±18.96 | 10     | 1 to 90   |                  | 117(23.3)   | 90(22.5)        | 27(26.5)        |                  |
| Positive                 | 679                 | 11.87±13.43 | 5      | 1 to 90   |                  | 385(76.7)   | 310(77.5)       | 75(73.5)        |                  |
| <b>HER2 status</b>       | 903                 |             |        |           | <b>&lt;0.001</b> | 507 (100.0) |                 |                 | 0.05             |
| Negative                 | 685                 | 11.3±12.73  | 5      | 1 to 90   |                  | 390(76.9)   | 319(78.8)       | 71(69.6)        |                  |
| Positive                 | 216                 | 18.82±19.24 | 10     | 1 to 90   |                  | 117(23.1)   | 86(21.2)        | 31(30.4)        |                  |
| <b>Subtypes</b>          | 885                 |             |        |           | <b>&lt;0.001</b> | 460(100)    |                 |                 | <b>0.006</b>     |
| Luminal A                | 269                 | 8.37±8.78   | 5      | 1 to 75   |                  | 137(29.7)   | 125(91.2)       | 12(8.8)         |                  |
| Luminal B                | 293                 | 11.88±11.67 | 8      | 1 to 80   |                  | 154(33.5)   | 126(81.8)       | 28(18.2)        |                  |
| Luminal HER2             | 115                 | 19.24±20.57 | 10     | 1 to 90   |                  | 61(13.3)    | 44(72.1)        | 17(27.9)        |                  |
| HER2-enriched            | 97                  | 18.52±17.94 | 12     | 1 to 75   |                  | 47(10.2)    | 36(76.6)        | 11(23.4)        |                  |
| TNBC                     | 111                 | 17.05±19.86 | 10     | 1 to 90   |                  | 61(13.3)    | 46(82.0)        | 15(18.0)        |                  |

Note: Significant associations are shown in bold

**Supplementary Table S5: Hazard ratios (95% CI) estimated from univariate Cox regression for each of the clinicopathological parameters with respect to the total follow-up period.**

| Parameter            | Categories                       | N of patients | N of events | HR    | 95% CI      | Wald's p         |
|----------------------|----------------------------------|---------------|-------------|-------|-------------|------------------|
| <b>DFS</b>           |                                  |               |             |       |             |                  |
| Age (median cut-off) | >52.7 vs. ≤52.7                  | 505 vs. 506   | 211 vs. 191 | 1.12  | 0.92-1.36   | 0.25             |
| Menopausal status    | Premenopausal vs. Postmenopausal | 463 vs. 548   | 164 vs. 238 | 0.77  | 0.63-0.94   | <b>0.011</b>     |
| Breast surgery       | Breast-conserving vs. MRM        | 315 vs. 694   | 98 vs. 302  | 0.64  | 0.55-0.76   | <b>&lt;0.001</b> |
| Tumor size           |                                  |               |             |       |             | <b>&lt;0.001</b> |
|                      | 2-5 vs. ≤2                       | 580 vs. 302   | 237 vs. 98  | 1.36  | 1.07-1.72   | <b>0.011</b>     |
|                      | >5 vs. ≤2                        | 129 vs. 302   | 67 vs. 98   | 1.96  | 1.43-2.67   | <b>&lt;0.001</b> |
| Nodal status         | ≥4 vs. 0-3                       | 603 vs. 408   | 296 vs. 106 | 2.22  | 1.78-2.77   | <b>&lt;0.001</b> |
| Hormonal therapy     | Yes vs. No                       | 804 vs. 205   | 315 vs. 87  | 0.8   | 0.63-1.01   | <b>0.062</b>     |
| Radiation therapy    | Yes vs. No                       | 770 vs. 214   | 322 vs. 72  | 1.28  | 0.99-1.65   | <b>0.062</b>     |
| Paclitaxel           | Yes vs. No                       | 866 vs. 145   | 331 vs. 71  | 0.82  | 0.63-1.06   | 0.13             |
| Histological grade   | III-IV vs. I-II                  | 511 vs. 496   | 211 vs. 189 | 1.17  | 0.96-1.43   | 0.11             |
| ER/PgR status        | Positive vs. Negative            | 737 vs. 225   | 279 vs. 93  | 0.81  | 0.64-1.03   | <b>0.081</b>     |
| HER2 status          | Positive vs. Negative            | 232 vs. 744   | 94 vs. 290  | 1.11  | 0.88-1.40   | 0.38             |
| Subtypes             |                                  |               |             |       |             | <b>0.011</b>     |
|                      | HER2-enriched vs. Luminal B      | 103 vs. 327   | 38 vs. 138  | 0.95  | 0.66-1.36   | 0.77             |
|                      | Luminal A vs. Luminal B          | 273 vs. 327   | 84 vs. 138  | 0.68  | 0.52-0.89   | <b>0.005</b>     |
|                      | Luminal-HER2 vs. Luminal B       | 123 vs. 327   | 51 vs. 138  | 1.01  | 0.73-1.39   | 0.96             |
|                      | TNBC vs. Luminal B               | 122 vs. 327   | 55 vs. 138  | 1.2   | 0.88-1.65   | 0.24             |
| Ki67                 |                                  |               |             | 1.003 | 0.999-1.007 | 0.11             |
| <b>OS</b>            |                                  |               |             |       |             |                  |
| Age (median cut-off) | >52.7 vs. ≤52.7                  | 505 vs. 506   | 173 vs. 152 | 1.2   | 0.96-1.49   | 0.10             |
| Menopausal status    | Premenopausal vs. Postmenopausal | 463 vs. 548   | 131 vs. 194 | 0.74  | 0.59-0.92   | <b>0.008</b>     |
| Breast surgery       | Breast-conserving vs. MRM        | 315 vs. 694   | 79 vs. 244  | 0.67  | 0.52-0.86   | <b>0.002</b>     |
| Tumor size           |                                  |               |             |       |             | <b>&lt;0.001</b> |
|                      | 2-5 vs. ≤2                       | 580 vs. 302   | 189 vs. 76  | 1.39  | 1.06-1.81   | <b>0.016</b>     |
|                      | >5 vs. ≤2                        | 129 vs. 302   | 60 vs. 76   | 2.24  | 1.60-3.14   | <b>&lt;0.001</b> |
| Nodal status         | ≥4 vs. 0-3                       | 603 vs. 408   | 250 vs. 75  | 2.52  | 1.95-3.27   | <b>&lt;0.001</b> |
| Hormonal therapy     | Yes vs. No                       | 804 vs. 205   | 250 vs. 75  | 0.73  | 0.57-0.95   | <b>0.018</b>     |
| Radiation therapy    | Yes vs. No                       | 770 vs. 214   | 263 vs. 55  | 1.28  | 0.96-1.72   | <b>0.092</b>     |
| Paclitaxel           | Yes vs. No                       | 866 vs. 145   | 266 vs. 59  | 0.84  | 0.63-1.12   | 0.24             |
| Histological grade   | III-IV vs. I-II                  | 511 vs. 496   | 176 vs. 148 | 1.22  | 0.98-1.52   | <b>0.076</b>     |
| ER/PgR status        | Positive vs. Negative            | 737 vs. 225   | 222 vs. 79  | 0.8   | 0.62-1.03   | <b>0.087</b>     |
| HER2 status          | Positive vs. Negative            | 232 vs. 744   | 79 vs. 230  | 1.09  | 0.85-1.41   | 0.49             |
| Subtypes             |                                  |               |             |       |             | <b>&lt;0.001</b> |
|                      | HER2-enriched vs. Luminal B      | 103 vs. 327   | 29 vs. 113  | 0.81  | 0.54-1.22   | 0.32             |
|                      | Luminal A vs. Luminal B          | 273 vs. 327   | 57 vs. 113  | 0.59  | 0.43-0.81   | <b>0.001</b>     |
|                      | Luminal-HER2 vs. Luminal B       | 123 vs. 327   | 46 vs. 113  | 1.09  | 0.77-1.53   | 0.64             |
|                      | TNBC vs. Luminal B               | 122 vs. 327   | 50 vs. 113  | 1.35  | 0.97-1.89   | 0.076            |
| Ki67                 |                                  |               |             | 1.007 | 1.002-1.011 | <b>0.003</b>     |

MRM, modified radical mastectomy.

Significant p-values are shown in bold.

**Supplementary Table S6: Cox multivariate regression analysis for DFS and OS in the entire cohort. sTIL density and lymphocytic subsets examined as single markers.**

| Parameter                              | Events/Total | HR (95% CI)      | P-value      |
|----------------------------------------|--------------|------------------|--------------|
| <b>DFS</b>                             |              |                  |              |
| <b>Model 1 *</b>                       |              |                  |              |
| <b>sCD3</b>                            |              |                  |              |
| High                                   | 55/180       | 0.69 (0.51-0.94) | <b>0.017</b> |
| Low                                    | 205/528      | Reference        | --           |
| <b>Model 2 **</b>                      |              |                  |              |
| <b>sCD8</b>                            |              |                  |              |
| High                                   | 67/203       | 0.74 (0.56-0.98) | <b>0.032</b> |
| Low                                    | 247/606      | Reference        | --           |
| <b>Model 3 ***</b>                     |              |                  |              |
| <b>iCD8</b>                            |              |                  |              |
| High                                   | 62/203       | 0.64 (0.48-0.85) | <b>0.002</b> |
| Low                                    | 252/606      | Reference        | --           |
| <b>Model 4 ****</b>                    |              |                  |              |
| <b>sFOXP3</b>                          |              |                  |              |
| High                                   | 48/167       | 0.69 (0.50-0.97) | <b>0.03</b>  |
| Low                                    | 192/497      | Reference        | --           |
| <b>Model 5 +</b>                       |              |                  |              |
| <b>total CD3</b>                       |              |                  |              |
| High                                   | 51/181       | 0.60 (0.44-0.82) | <b>0.002</b> |
| Low                                    | 209/527      | Reference        | --           |
| <b>Model 6 ++</b>                      |              |                  |              |
| <b>total CD8</b>                       |              |                  |              |
| High                                   | 64/204       | 0.68 (0.52-0.91) | <b>0.008</b> |
| Low                                    | 250/605      | Reference        | --           |
| <b>sTIL density (10% increment) #</b>  |              |                  |              |
| <b>OS</b>                              |              |                  |              |
| <b>Model 1^</b>                        |              |                  |              |
| <b>sFOXP3</b>                          |              |                  |              |
| High                                   | 39/167       | 0.71 (0.49-1.03) | 0.071        |
| Low                                    | 155/497      | Reference        | --           |
| <b>Model 2^^</b>                       |              |                  |              |
| <b>total CD3</b>                       |              |                  |              |
| High                                   | 44/181       | 0.68 (0.49-0.96) | <b>0.029</b> |
| Low                                    | 163/527      | Reference        | --           |
| <b>sTIL density (10% increment) ##</b> |              |                  |              |

Notes:

1. Significant results in bold
2. In all models, markers were adjusted for menopausal status, tumor size, nodal status, histological grade, radiation therapy and subtypes.
3. The following clinicopathological parameters retained their statistical significance ( $p < 0.050$ ) in the respective multivariate analyses: \*tumor size ( $p = 0.011$ ), nodal status ( $p < 0.001$ ); \*\* tumor size ( $p = 0.007$ ), nodal status ( $p < 0.001$ ), \*\*\* tumor size ( $p = 0.007$ ), nodal status ( $p < 0.001$ ), \*\*\*\* nodal status ( $p < 0.001$ ), + nodal status ( $p < 0.001$ ) and tumor size ( $p = 0.016$ ), ++ nodal status ( $p < 0.001$ ), ^ nodal status ( $p < 0.001$ ), ^^ nodal status ( $p < 0.001$ ), tumor size ( $p = 0.009$ ) and subtypes ( $p = 0.018$ ), # nodal status ( $p < 0.001$ ) and subtypes ( $p = 0.009$ ); ## nodal status ( $p < 0.001$ ), tumor size ( $p = 0.016$ ) and subtypes ( $p < 0.001$ );
